# Supplementary material for: Habitual tea drinking modulates brain efficiency: evidence from brain connectivity evaluation
Source: PubMed Central journal article supplement (PMC6594801; doi:10.18632/aging.102023), 2019-06-14
Supplement: aging-11-102023-s001.pdf [file aging-11-102023-s001.pdf]

## SUPPLEMENTARY TABLE

**Supplementary Table 1. The list of region names and their abbreviations of the default mode network based on the parcellation of the automated anatomical labeling (AAL) atlas.**

| <b>Region name</b>                              | <b>Abbr.</b> | <b>Belongs to</b> |
|-------------------------------------------------|--------------|-------------------|
| Left superior frontal gyrus (dorsal)            | SFGdor.L     | Frontal           |
| Right superior frontal gyrus (dorsal)           | SFGdor.R     | Frontal           |
| Left superior frontal gyrus (medial)            | SFGmed.L     | Frontal           |
| Right Superior frontal gyrus (medial)           | SFGmed.R     | Frontal           |
| Left anterior cingulate and paracingulate gyri  | ACG.L        | Limbic            |
| Right anterior cingulate and paracingulate gyri | ACG.R        | Limbic            |
| Left posterior cingulate gyrus                  | PCG.L        | Limbic            |
| Right posterior cingulate gyrus                 | PCG.R        | Limbic            |
| Left parahippocampal gyrus                      | PHG.L        | Limbic            |
| Right parahippocampal gyrus                     | PHG.R        | Limbic            |
| Left angular gyrus                              | ANG.L        | Parietal          |
| Right angular gyrus                             | ANG.R        | Parietal          |
| Right middle temporal gyrus                     | MTG.R        | Temporal          |
| Left inferior temporal gyrus                    | ITG.L        | Temporal          |
